1 **Causally Associations of Blood Lipids Levels with COVID-19 Risk: Mendelian Randomization**

2 **Study**

3 Kun Zhang,<sup>1,3</sup> Yan Guo,<sup>1,3</sup> Zhuo-Xin Wang,<sup>1</sup> Jing-Miao Ding,<sup>1</sup> Shi Yao,<sup>1</sup> Hao Chen,<sup>1</sup> Dong-Li Zhu,<sup>1</sup> Kun

4 Zhang,<sup>2</sup> Wei Huang,<sup>2</sup> Shan-Shan Dong,<sup>1,\*</sup> Tie-Lin Yang<sup>1,2,\*</sup>

5

6 <sup>1</sup>Key Laboratory of Biomedical Information Engineering of Ministry of Education, Biomedical

7 Informatics & Genomics Center, School of Life Science and Technology, Xi'an Jiaotong University,

8 Xi'an, Shaanxi, P. R. China, 710049

9 <sup>2</sup>Department of Trauma Surgery, Honghui Hospital, College of Medicine, Xi'an Jiaotong University,

10 Xi'an, Shaanxi, P. R. China, 710054

11 <sup>3</sup>These authors contributed equally to this study.

12 \*Correspondence: yangtielin@xjtu.edu.cn; dongss@xjtu.edu.cn

13 **Abstract**

14 **Background:** Coronavirus disease 2019 (COVID-19) is a global pandemic caused by the severe acute  
15 respiratory syndrome coronavirus 2 (SARS-Cov-2). It has been found that coronary artery disease  
16 (CAD) is a comorbid condition for COVID-19. As the risk factors of CAD, whether blood lipids levels  
17 are causally related to increasing susceptibility and severity of COVID-19 is still unknown.

18 **Design:** We performed two-sample Mendelian Randomization (MR) analyses to explore whether  
19 dyslipidemia, low density lipoprotein cholesterol (LDL-c), high density lipoprotein cholesterol (HDL-  
20 c), triglyceride (TG) and total cholesterol (TC) were causally related to COVID-19 risk and severity.  
21 The GWAS summary data of blood lipids involving in 188,578 individuals and dyslipidemia in a total  
22 of 53,991 individuals were used as exposures, respectively. Two COVID-19 GWASs including 1,221  
23 infected patients and 1,610 severe patients defined as respiratory failure were employed as outcomes.  
24 Based on the MR estimates, we further carried out gene-based and gene-set analysis to explain the  
25 potential mechanism for causal effect.

26 **Results:** The MR results showed that dyslipidemia was casually associated with the susceptibility of  
27 COVID-19 and induced 27% higher odds for COVID-19 infection (MR-IVW OR = 1.27, 95% CI: 1.08  
28 to 1.49,  $p$ -value =  $3.18 \times 10^{-3}$ ). Moreover, the increasing level of blood TC will raise 14 % higher odds  
29 for the susceptibility of COVID-19 (MR-IVW OR = 1.14, 95% CI: 1.04 to 1.25,  $p$ -value =  $5.07 \times 10^{-3}$ ).  
30 Gene-based analysis identified that *ABO* gene was associated with TC and the gene-set analysis found  
31 that immune processes were involved in the risk effect of TC.

32 **Conclusions:** We obtained three conclusions: 1) Dyslipidemia is casually associated with the  
33 susceptibility of COVID-19; 2) TC is a risk factor for the susceptibility of COVID-19; 3) The different  
34 susceptibility of COVID-19 in specific blood group may be partly explained by the TC concentration

35 in diverse ABO blood groups.

36

37 **Key words:** Blood lipids; COVID-19; Mendelian randomization; ABO; Immunity

38 **Introduction**

39 Coronavirus disease 2019 (COVID-19) caused by the severe acute respiratory syndrome, coronavirus  
40 2 (SARS-Cov-2) is a global pandemic <sup>1, 2</sup>. This disease progresses from asymptomatic to acute  
41 respiratory distress syndrome and multiple organ dysfunction, and has become a major threat to public  
42 health in more than 160 countries <sup>1,2</sup>. As of June 26, 2020, there were more than 9.69 million confirmed  
43 cases, with total deaths increasing to 487,997 worldwide. Considering the severity of COVID-19, it is  
44 urgent to explore the susceptibility factors of COVID-19, which is helpful to develop effective policies  
45 and personalized treatments to control the spread of the disease to susceptible groups.

46  
47 Recent studies <sup>1, 2</sup> have found that more than 20% of the confirmed cases had a history of coronary  
48 artery disease (CAD). Blood lipids, including low density lipoprotein cholesterol (LDL-c), high density  
49 lipoprotein cholesterol (HDL-c), triglyceride (TG) and total cholesterol (TC) are heritable and  
50 modifiable risk factors for CAD <sup>3, 4</sup>. However, whether blood lipids levels are causally related to  
51 increasing susceptibility and severity for COVID-19 is still unknown.

52  
53 Mendelian randomization (MR) is an epidemiological method in which environmental exposure-related  
54 genetic variations are used as instrumental variables (IVs) to evaluate the association between exposures  
55 and outcomes <sup>5, 6</sup>. It can avoid the issues of confusion and has been demonstrated as an effective strategy  
56 to identify causal effect <sup>5-10</sup>. In this study, we conducted a two-sample Mendelian randomization study  
57 to explore the possible causal associations between blood lipids and COVID-19 susceptibility and  
58 severity, and investigate the potential mechanisms underlying the causal effect.

59

## 60 **Methods**

61 A step-by-step workflow in this study is presented in Figure 1.

62

### 63 **Datasets used in this study**

#### 64 *Blood lipids*

65 We collected data for HDL-c, LDL-c, TG and TC from a published genome-wide association study  
66 (GWAS)<sup>3</sup> (<http://csg.sph.umich.edu/abecasis/public/lipids2013/>) involving in a total of 188,578  
67 European-ancestry individuals. GWAS summary data of dyslipidemia was obtained from the Genetic  
68 Epidemiology Research on Adult Health and Aging (GERA) (<https://cnsgenomics.com/content/data>)  
69 with 53,991 individuals<sup>10</sup>.

#### 70 *COVID-19*

71 For assessment of associations with COVID-19 risk, we used the latest COVID-19 GWAS results from  
72 GRASP database (<https://grasp.nhlbi.nih.gov/Covid19GWASResults.aspx>). The phenotype used in this  
73 GWAS was case/control for COVID-19 infection containing 1,221 positive COVID-19 tests and 4,117  
74 negative tests from UK Biobank individuals (released on June 5, 2020). To explore the causal effect of  
75 blood lipids on severity of COVID-19, we also accessed GWAS of severe COVID-19 defined as  
76 respiratory failure<sup>11</sup> (<http://www.c19-genetics.eu/>). This GWAS included 1,610 severe COVID-19  
77 patients and 2,205 control participants from Italy and Spain. These two GWASs were all conducted with  
78 the correction of age, sex and top 10 principal components.

79

### 80 **Data Harmonization Process**

81 For each exposure GWAS, we performed harmonization process using the following criteria:

- 82 1) Remove the SNPs located in major histocompatibility complex (MHC) region.
- 83 2) Select the SNPs with a common frequency of the effect allele (EAF) ( $> 0.01$  and  $< 0.99$ ).
- 84 3) Standardize the effect size ( $\beta$ ) and standard error ( $se$ ) for each GWAS data with the function of minor
- 85 allele frequency and sample size using the following formula <sup>12</sup>:

86 
$$\beta = \frac{z}{\sqrt{2p(1-p)(n+z^2)}}, se = \frac{1}{\sqrt{2p(1-p)(n+z^2)}}$$

87 where  $z = \beta/se$  from the original summary data,  $p$  is the minor allele frequency, and  $n$  is the total sample

88 size.

89

### 90 **Instrumental variables (IVs) selection**

91 We selected independent and genome-wide significant GWAS SNPs of HDL-c, LDL-c, TG, TC and

92 dyslipidemia by use of the clumping algorithm in PLINK (<http://pngu.mgh.harvard.edu/purcell/plink/>)

93 <sup>13</sup> at a suggestive threshold ( $r^2$  threshold = 0.001, window size = 1 Mb,  $p$ -value =  $5 \times 10^{-8}$ ). The 1000

94 Genomes Project (<http://www.internationalgenome.org/>) data were used as the reference for linkage

95 disequilibrium (LD) estimation. For each outcome, we then removed outlier pleiotropic SNPs using

96 RadialMR <sup>14</sup> with the  $p$ -value threshold of 0.05. RadialMR <sup>14</sup> identified outlying genetic instruments

97 via heterogeneity test (modified Q-statistics). After the removal of pleiotropy, the remaining exposure

98 related SNPs for each outcome as instrumental variables (IVs) were utilized to perform MR analyses.

99

### 100 **MR analyses and pleiotropy assessment**

101 We conducted four complementary two-sample MR methods, including Inverse-Variance Weighted

102 (IVW) method, weighted median method, weighted mode method and MR-Egger method, which make

103 different assumptions about horizontal pleiotropy.

104

105 The IVW method assumes balanced pleiotropy<sup>15</sup>. The pleiotropy is assessed via Cochran's  $Q$  statistic  
106 and presented as excessive heterogeneity which will inflate the estimate of MR analysis<sup>16</sup>. The MR-  
107 Egger method is based on the assumption which indicate instrument strength independent of the direct  
108 effects<sup>15</sup>. MR-Egger estimates can be also evaluated by the regression dilution  $I^2_{(GX)}$ <sup>17</sup> according to the  
109 assumption that no measurement error in the SNP exposure effects. If  $I^2_{(GX)}$ <sup>17</sup> was sufficiently low ( $I^2_{(GX)} < 0.9$ ), the correction analysis was conducted to assess the causal effect by SIMEX. The intercept  
110 term of MR-Egger method can used for evaluating the directional pleiotropic effect<sup>18</sup>. When the  
111 intercept is zero or its  $p$ -value was not significant ( $p$ -value  $> 0.05$ ) were considered as non-pleiotropy.  
112 Moreover, we also used the Rucker's  $Q'$  statistic<sup>19</sup> to measure the heterogeneity for MR-Egger method.  
113 If the difference  $Q - Q'$  is sufficiently extreme with respect to a  $\chi^2$  distribution with the 1 degree of  
114 freedom, we indicated that directional pleiotropy is an important factor and MR-Egger model provides  
115 a better fit than the IVW method<sup>20</sup>. All methods of two-sample MR analyses were measured by  
116 TwoSampleMR package in R. For various estimates for different measures, we select the main MR  
117 method as following rules:

119 1) If no directional pleiotropy in MR estimates ( $Q$  statistic:  $p$ -value  $> 0.05$ , MR-Egger intercept:  
120 intercept = 0 or  $p$ -value  $> 0.05$ ,  $Q - Q'$ :  $p$ -value  $> 0.05$ ), IVW method was used.

121 2) If directional pleiotropy was detected (MR-Egger intercept: intercept  $\neq 0$  and  $p$ -value  $< 0.05$ ,  $Q - Q'$ :  
122  $p$ -value  $< 0.05$ ) and  $p$ -value  $> 0.05$  for the test of  $Q'$ , MR-Egger method was used.

123 3) If directional pleiotropy was detected (MR-Egger intercept: intercept  $\neq 0$  and  $p$ -value  $< 0.05$ ,  $Q - Q'$ :  
124  $p$ -value  $< 0.05$ ) and  $p$ -value  $< 0.05$  for the test of  $Q'$ , weighted median method was used.

125

126 **Sensitivity analysis**

127 Leave-one-out sensitivity analysis was implemented to assess whether any significant results were  
128 generated by a specific SNP in IVW models.

129

130 **Gene-based and gene-set analysis**

131 MAGMA (<https://ctg.cncr.nl/software/magma>)<sup>21</sup> is commonly used for gene and gene-set analyses  
132 based on GWAS and genotype data. In order to explore the association of TC and COVID-19, we  
133 implemented MAGMA to identify genes and gene sets in which multiple SNPs show moderate  
134 association to TC without reaching the stringent genome-wide significance level.

135 *Genome-wide gene-based association study*

136 The genome-wide gene-based association study (GWGAS) is based on the model of multiple linear  
137 principal components regression and calculated the gene *p-value* using F-test<sup>22</sup>. All 19,427 protein-  
138 coding genes from the NCBI 37.3 gene definitions were employed for SNPs annotation. We mapped  
139 SNPs to genes by a defined window around each gene of 2kb away from the transcription start site (TSS)  
140 upstream and 1kb away from the transcription stop site downstream based on human reference assembly  
141 (GRCh37 or hg19)<sup>23</sup>. The GWGAS analysis was performed to quantify the degree of association for  
142 each gene to TC and to compute the correlations between genes are estimated according to LD statistics.

143 The LD reference was also from Phase 3 of 1,000 Genomes.

144 *Gene-set analysis*

145 The gene-set analysis is built as an independent layer around the gene analysis, while it also on the  
146 strength of the gene *p-value* and gene correlation matrix from the previous step in order to compensate  
147 for the dependencies between genes<sup>22</sup>. A total of 7,521 gene sets were derived from Gene Ontology



148 (GO) biological processes and the 186 pathways from Kyoto Encyclopedia of Genes and Genomes  
149 (KEGG) as auxiliary files for gene-set analysis, which obtained from the Molecular Signatures Database  
150 (MSigDB) version 6.0 (<https://www.gsea-msigdb.org/gsea/downloads.jsp>).

151

## 152 **Multiple testing correction**

153 We employed false discovery rate (FDR) to address multiple comparisons issue and the adjusted *p*-  
154 *value* < 0.05 was used for judging significance. For MR estimates, we adopted an FDR control  
155 procedure for the susceptibility and severity of COVID-19 separately.

156

## 157 **Results**

### 158 **IVs selection**

159 After data harmonization and clumping, we identified 20 SNPs, 101 SNPs, 79 SNPs, 59 SNPs and 98  
160 SNPs for dyslipidemia, HDL-c, LDL-c, TG and TC, respectively. For each outcome, the final IVs are  
161 shown in Table S1.

162

### 163 **Causal effect of dyslipidemia on COVID-19**

164 We evaluated whether dyslipidemia is causally related to COVID-19 firstly. The assessment of  
165 pleiotropy is shown in Table S1. Since there was no significant evidence of pleiotropy (all *p value* >  
166 0.05, Table S1), we chose IVW as the main MR method. We found that dyslipidemia was causally  
167 associated with the susceptibility of COVID-19 after FDR correction (MR-IVW *p-value* =  $3.18 \times 10^{-3}$ ,  
168 FDR =  $1.30 \times 10^{-2}$ ) (Table 1). The estimate of IVW showed that dyslipidemia could raise 27% odds for  
169 the infection risk of COVID-19 (MR-IVW OR = 1.27, 95% CI: 1.08 to 1.49) (Figure 2). Besides the

170 IVW method, the weighted median and MR-Egger tests also showed consistent causal associations  
171 (MR-Weighted median OR = 1.26, 95% CI: 1.01 to 1.56,  $p$ -value =  $4.00 \times 10^{-2}$ ; MR-Egger OR = 1.53,  
172 95% CI: 1.12 to 2.10,  $p$ -value =  $2.00 \times 10^{-2}$ ) (Table 1). However, dyslipidemia had no causally relevance  
173 to severe COVID-19 (Table 1 and Figure 2). In sensitivity analyses, the results of leave-one-out  
174 permutation didn't find individual influential SNPs in IVW models ( $p$ -value < 0.05) (Figure S1).

175

### 176 **Causal effect of blood lipids on COVID-19**

177 We further assessed the causal effects of blood lipids levels, including HDL-c, LDL-c, TC and TG on  
178 COVID-19 to identify the specific risk lipid. We didn't detect any evidence of pleiotropy as well (all  $p$   
179 value > 0.05, Table S1), thus we still chose IVW as the main MR method. We identified TC was a risk  
180 factor for the susceptibility of COVID-19 (MR-IVW  $p$ -value =  $5.07 \times 10^{-3}$ , FDR =  $1.30 \times 10^{-2}$ ) (Table 1).  
181 As shown in Figure 2, the increasing concentration of TC in blood could induce 14 % higher odds of  
182 COVID-19 infection risk (MR-IVW OR = 1.14, 95% CI: 1.04 to 1.25). Besides, the weighted median  
183 test also showed a causal association (MR-Weighted median OR = 1.23, 95% CI: 1.06 to 1.43,  $p$ -value  
184 =  $5.00 \times 10^{-3}$ ) (Table 1). Leave-one-out analysis indicated that no single SNP was driving the causal  
185 estimates (Figure S1). We also measured the relationship between four blood lipids and severe COVID-  
186 19. Consistent with dyslipidemia, there was no causal effects for blood lipids-COVID-19 severity pairs.

187

### 188 **Gene-based and gene-set analyses for TC**

189 In our above results, we have discovered the risk effect of TC to the susceptibility of COVID-19. We  
190 wonder explain the internal linkage between TC and COVID-19 preliminarily, thus we investigated the  
191 potential mechanism of TC by gene-based and gene-set analysis.

192 *Gene-based analysis for TC*

193 For gene-based analysis, a total of 17,699 genes which were represented by at least one SNP were  
194 identified. After correction for multiple testing, we identified 668 genes linked to TC (Figure 3A and  
195 Table S2). It should be noticed that *ABO* was identified to be associated with TC significantly (*p-value*  
196 =  $6.80 \times 10^{-11}$ , FDR =  $1.43 \times 10^{-8}$ ). Some observational studies have found that the level of blood lipids  
197 was related to ABO blood group and Table 2 lists the detailed information about these observational  
198 studies<sup>24-29</sup>. All of these studies provide a conclusion that TC is higher in A or non-O blood group, but  
199 lower in O blood group. On the other side, GWAS on severe COVID-19 has revealed the relationship  
200 between ABO blood group locus and COVID-19<sup>11</sup>. It has been found a higher risk in blood group A  
201 than in other blood group and a protective effect in blood group O, which was coincident with the results  
202 of observational investigations based on phenotype<sup>30-32</sup>. In general, we inferred that the different  
203 susceptibility of COVID-19 in specific blood group may be partly explained by the TC levels in diverse  
204 ABO blood group (Figure 3B).

205 *Gene-set analysis for TC*

206 For the GO biological processes, we identified 89 processes significantly associated with TC (FDR <  
207 0.05), which are mostly involved in lipid metabolism (Table S3). For the KEGG pathways, we just  
208 identified 2 pathways (Carbohydrate metabolism and Glycan biosynthesis and metabolism)  
209 significantly associated with TC after FDR corrections. Besides, we also found 20 KEGG pathways  
210 with nominally significant associations with TC (*p-value* < 0.05) (Table S4). In all related  
211 processes/pathways, six of them are related to immune response and may participate in the infection  
212 and progression of COVID-19, including negative regulation of lymphocyte mediated immunity,  
213 interleukin-10 biosynthetic process, interferon- $\beta$  (INF- $\beta$ ) biosynthetic process, Fc gamma R-mediated

214 phagocytosis, antigen processing and presentation and primary immunodeficiency. The dysfunction of  
215 immunity would induce poor immune response for SARS-CoV-2 infection, which cause lung and  
216 systemic pathology <sup>33, 34</sup>.

217

## 218 **Discussion**

219 In this study, we implemented two-sample MR analyses to explore the possible causal associations  
220 between blood lipids and COVID-19. We have found potential causal effects of dyslipidemia and blood  
221 TC on the infected risk of COVID-19.

222

223 To explain the potential influence of TC on COVID-19, we explored the TC-related genes and gene sets.

224 It is notable that *ABO* gene performs quite strong relevance to TC, which was also reported by previous

225 GWAS of TC <sup>3</sup>. Besides, some observational studies have found that the blood lipids level was related

226 to ABO blood group. The higher level of TC was found in non-O blood group and was significantly

227 associated with an increased prevalence of CVD <sup>24-29</sup>. In addition, The GWAS of severe COVID-19 has

228 identified the association signal at ABO blood group locus <sup>11</sup>. Based on the blood-group-specific

229 analysis, they observed a higher risk of COVID-19 in blood group A than in other blood group and a

230 protective effect in blood group O, which was coincident with the results of observational investigations

231 based on phenotype <sup>30-32</sup>. In summary of these results, we inferred that the different susceptibility of

232 COVID-19 in specific blood group may be partly explained by the TC concentration in diverse ABO

233 blood groups.

234

235 The result of gene-set analysis identified a total of 89 biological processes and 20 pathways associated

236 with TC. Besides the processes/pathways related to lipid metabolism, six processes/pathways belonged  
237 to immune system were shown moderate associations with TC, including three pathways related to  
238 immunity and immunodeficiency (negative regulation of lymphocyte mediated immunity, antigen  
239 processing and presentation, primary immunodeficiency) and other three processes involved in immune  
240 cytokines and phagocytosis (interleukin-10 biosynthetic process, interferon- $\beta$  biosynthetic process, Fc  
241 gamma R-mediated phagocytosis). The biosynthetic process of interleukin-10 (IL-10) and interferon- $\beta$   
242 (INF- $\beta$ ) can produce the cytokines with pleiotropic effects in immunoregulation and inflammation,  
243 which will destroy host immune response if the biosynthesis is broken. The phagocytosis is an essential  
244 role in host-defense mechanisms and Fc gamma receptors can recognize foreign extracellular materials  
245 and initiate a variety of signals to start immune process. As a disease caused by the SARS-Cov-2,  
246 COVID-19 is in close and direct touch with immunity<sup>33</sup>. Therefore, we raise a hypothesis that the risk  
247 effect of TC on COVID-19 may be mediated by the dysfunction of immune system.

248

249 This is the first study to characterize the potential causality of blood lipids for the susceptibility and  
250 severity of COVID-19 using two-sample MR design rather than observational and perspective studies  
251 based on conventional association analysis. The limitations of the current study should be addressed.  
252 Due to the limitation of data resource, our findings are based on European cohort which cannot represent  
253 the universal conclusions for other ethnic groups. In addition, the potential mechanism of the risk effect  
254 for TC was discussed superficially, which needed to carry out further investigation to get more data  
255 support and further experimental verification.

256

257 In summary, we carried out a two-sample MR design for blood lipids and COVID-19, and obtained

258 following conclusions: 1) Dyslipidemia is causally associated with the susceptibility of COVID-19; 2)  
259 The higher total cholesterol level will increase the susceptibility of COVID-19; 3) The different  
260 susceptibility of COVID-19 in specific blood group may be partly explained by the TC concentration  
261 in diverse ABO blood groups; 4) The risk effect of total cholesterol on COVID-19 may be mediated by  
262 the dysfunction of immunity.

263 **Conflict of Interest**

264 The authors have nothing to disclose.

265

266 **Acknowledgements**

267 This study is supported by National Natural Science Foundation of China (31871264, 31970569);

268 Zhejiang Provincial Natural Science Foundation of China (LGF18C060002); Shannxi Provincial key

269 research and development plan (2019ZDLSF01-09) and the Fundamental Research Funds for the

270 Central Universities (xzy032020039, xzy032020023).

## Reference

1. Guan W-J, Ni Z-Y, Hu Y, Liang W-H, Ou C-Q, He J-X, Liu L, Shan H, Lei C-L, Hui DSC, et al. Clinical Characteristics of Coronavirus Disease 2019 in China. *The New England journal of medicine*. 2020;382:1708-1720.
2. Huang C, Wang Y, Li X, Ren L, Zhao J, Hu Y, Zhang L, Fan G, Xu J, Gu X, et al. Clinical features of patients infected with 2019 novel coronavirus in Wuhan, China. *Lancet (London, England)*. 2020;395:497-506.
3. Willer CJ, Schmidt EM, Sengupta S, Peloso GM, Gustafsson S, Kanoni S, Ganna A, Chen J, Buchkovich ML, Mora S, et al. Discovery and refinement of loci associated with lipid levels. *Nature Genetics*. 2013;45:1274-1283.
4. WP C. Cholesterol and lipids in the risk of coronary artery disease--the Framingham Heart Study. *The Canadian journal of cardiology*. 1988;5A-10A.
5. Boef AGC, Dekkers OM and le Cessie S. Mendelian randomization studies: a review of the approaches used and the quality of reporting. *International Journal of Epidemiology*. 2015;44:496-511.
6. Sleiman PMA and Grant SFA. Mendelian Randomization in the Era of Genomewide Association Studies. *Clinical Chemistry*. 2010;56:723.
7. Davies NM, von Hinke Kessler Scholder S, Farbmacher H, Burgess S, Windmeijer F and Smith GD. The many weak instruments problem and Mendelian randomization. *Stat Med*. 2015;34:454-468.
8. Burgess S, Thompson SG and Collaboration CCG. Avoiding bias from weak instruments in Mendelian randomization studies. *International Journal of Epidemiology*. 2011;40:755-764.
9. Davey Smith G and Ebrahim S. 'Mendelian randomization': can genetic epidemiology contribute to understanding environmental determinants of disease?\*. *International Journal of Epidemiology*. 2003;32:1-22.
10. Zhu Z, Zheng Z, Zhang F, Wu Y, Trzaskowski M, Maier R, Robinson MR, McGrath JJ, Visscher PM, Wray NR, et al. Causal associations between risk factors and common diseases inferred from GWAS summary data. *Nature communications*. 2018;9:224-224.
11. Ellinghaus D, Degenhardt F, Bujanda L, Buti M, Albillos A, Invernizzi P, Fernández J, Prati D, Baselli G, Asselta R, et al. Genomewide Association Study of Severe Covid-19 with Respiratory Failure. *The New England journal of medicine*. 2020:NEJMoa2020283.
12. Zhu Z, Zhang F, Hu H, Bakshi A, Robinson MR, Powell JE, Montgomery GW, Goddard ME, Wray NR, Visscher PM, et al. Integration of summary data from GWAS and eQTL studies predicts complex trait gene targets. *Nature Genetics*. 2016;48:481-487.
13. Purcell S, Neale B, Todd-Brown K, Thomas L, Ferreira MAR, Bender D, Maller J, Sklar P, de Bakker PIW, Daly MJ, et al. PLINK: a tool set for whole-genome association and population-based linkage analyses. *American journal of human genetics*. 2007;81:559-575.
14. Bowden J, Spiller W, Del Greco M F, Sheehan N, Thompson J, Minelli C and Davey Smith G. Improving the visualization, interpretation and analysis of two-sample summary data Mendelian randomization via the Radial plot and Radial regression. *International journal of epidemiology*. 2018;47:1264-1278.
15. Bowden J, Davey Smith G and Burgess S. Mendelian randomization with invalid instruments: effect estimation and bias detection through Egger regression. *International journal of epidemiology*. 2015;44:512-525.
16. G CW. The combination of estimates from different experiments. *Biometrics*. 1954;10:28.



17. Bowden J, Del Greco M F, Minelli C, Davey Smith G, Sheehan NA and Thompson JR. Assessing the suitability of summary data for two-sample Mendelian randomization analyses using MR-Egger regression: the role of the I<sup>2</sup> statistic. *International journal of epidemiology*. 2016;45:1961-1974.
18. Hemani G, Bowden J and Davey Smith G. Evaluating the potential role of pleiotropy in Mendelian randomization studies. *Human molecular genetics*. 2018;27:R195-R208.
19. Rücker G, Schwarzer G, Carpenter JR, Binder H and Schumacher M. Treatment-effect estimates adjusted for small-study effects via a limit meta-analysis. *Biostatistics*. 2010;12:122-142.
20. Bowden J, Del Greco M F, Minelli C, Davey Smith G, Sheehan N and Thompson J. A framework for the investigation of pleiotropy in two-sample summary data Mendelian randomization. *Stat Med*. 2017;36:1783-1802.
21. de Leeuw CA, Mooij JM, Heskes T and Posthuma D. MAGMA: generalized gene-set analysis of GWAS data. *PLoS computational biology*. 2015;11:e1004219-e1004219.
22. de Leeuw CA, Neale BM, Heskes T and Posthuma D. The statistical properties of gene-set analysis. *Nature Reviews Genetics*. 2016;17:353-364.
23. Nagel M, Jansen PR, Stringer S, Watanabe K, de Leeuw CA, Bryois J, Savage JE, Hammerschlag AR, Skene NG, Muñoz-Manchado AB, et al. Meta-analysis of genome-wide association studies for neuroticism in 449,484 individuals identifies novel genetic loci and pathways. *Nature Genetics*. 2018;50:920-927.
24. Franchini M, Mengoli C, Capuzzo E, Terenziani I, Bonfanti C and Lippi G. Correlation between ABO Blood Group, and Conventional Hematological and Metabolic Parameters in Blood Donors. *Semin Thromb Hemost*. 2016;42:075-086.
25. Chen Y, Chen C, Ke X, Xiong L, Shi Y, Li J, Tan X and Ye S. Analysis of Circulating Cholesterol Levels as a Mediator of an Association Between ABO Blood Group and Coronary Heart Disease. *Circulation: Cardiovascular Genetics*. 2014;7:43-48.
26. Gillum RF. Blood groups, serum cholesterol, serum uric acid, blood pressure, and obesity in adolescents. *Journal of the National Medical Association*. 1991;83:682-688.
27. Cetin MS, Ozcan Cetin EH, Aras D, Topaloglu S, Temizhan A, Kisacik HL and Aydogdu S. Non-O blood groups can be a prognostic marker of in-hospital and long-term major adverse cardiovascular events in patients with ST elevation myocardial infarction undergoing primary percutaneous coronary intervention. *Thrombosis Research*. 2015;136:599-605.
28. Paquette M, Dufour R and Baass A. ABO blood group is a cardiovascular risk factor in patients with familial hypercholesterolemia. *Journal of Clinical Lipidology*. 2018;12:383-389.e1.
29. Li S, Xu R-X, Guo Y-L, Zhang Y, Zhu C-G, Sun J and Li J-J. ABO blood group in relation to plasma lipids and proprotein convertase subtilisin/kexin type 9. *Nutrition, Metabolism and Cardiovascular Diseases*. 2015;25:411-417.
30. Wu Y, Feng Z, Li P and Yu Q. Relationship between ABO blood group distribution and clinical characteristics in patients with COVID-19. *Clinica Chimica Acta*. 2020;509:220-223.
31. Zietz M and Tatonetti NP. Testing the association between blood type and COVID-19 infection, intubation, and death. *medRxiv : the preprint server for health sciences*. 2020:2020.04.08.20058073.
32. Cheng Y, Cheng G, Chui CH, Lau FY, Chan PKS, Ng MHL, Sung JYJ and Wong RSM. ABO Blood Group and Susceptibility to Severe Acute Respiratory Syndrome. *JAMA*. 2005;293:1447-1451.
33. Tay MZ, Poh CM, Rénia L, MacAry PA and Ng LFP. The trinity of COVID-19: immunity, inflammation and intervention. *Nature reviews Immunology*. 2020;20:363-374.
34. Shen B, Yi X, Sun Y, Bi X, Du J, Zhang C, Quan S, Zhang F, Sun R, Qian L, et al. Proteomic and

Metabolomic Characterization of COVID-19 Patient Sera. *Cell*. 2020:S0092-8674(20)30627-9.

## Figure Legends

**Figure 1. The MR analysis pipeline of the current study.**

**Figure 2. Causal effects of dyslipidemia and TC on COVID-19.** Summary of the Mendelian randomization (MR) estimates derived from the main inverse-variance weighted, MR-Egger, weighted median and weighted mode-based methods for dyslipidemia and TC to the susceptibility of COVID-19 (COVID-19).

**Figure 3. The relationships among the TC level, the susceptibility of COVID-19 and the different ABO blood group.** A. Results of gene-based analysis. The dots above the red line represents the genes significantly associated ( $FDR < 0.05$ ) with TC. The red dot indicates *ABO* gene. B. Schematic diagram displays the relationships among the level of TC, the risk of COVID-19 infection and different ABO blood group. Black lines represent the associations identified in previous studies and red line means the causal effect identified in our study.

**Table 1** Summary of the MR estimates for dyslipidemia, TC, TG, LDL-c and HDL-c to the susceptibility and severity of COVID-19<sup>1</sup>

| Lipid                         | IVW method        |          | Weighted median method |          | Weighted mode-based method |          | MR-Egger method   |          | FDR                 |
|-------------------------------|-------------------|----------|------------------------|----------|----------------------------|----------|-------------------|----------|---------------------|
|                               | OR (95% CI)       | <i>p</i> | OR (95% CI)            | <i>p</i> | OR (95% CI)                | <i>p</i> | OR (95% CI)       | <i>p</i> |                     |
| <b><i>COVID-19</i></b>        |                   |          |                        |          |                            |          |                   |          |                     |
| Dyslipidemia                  | 1.27(1.08, 1.49)  | 0.003    | 1.26 (1.01, 1.56)      | 0.040    | 1.22(0.93, 1.61)           | 0.170    | 1.53(1.12, 2.10)  | 0.020    | <b><i>0.013</i></b> |
| Total Cholesterol             | 1.14 (1.04, 1.25) | 0.005    | 1.23 (1.06, 1.43)      | 0.005    | 1.14 (0.99, 1.32)          | 0.070    | 1.15 (0.10, 1.33) | 0.061    | <b><i>0.013</i></b> |
| Triglycerides                 | 1.18 (0.98, 1.25) | 0.102    | 1.08 (0.90, 1.31)      | 0.392    | 1.15 (0.94, 1.41)          | 0.179    | 1.15 (0.94, 1.40) | 0.170    | 0.128               |
| LDL Cholesterol               | 1.09 (1.00, 1.18) | 0.051    | 1.06 (0.94, 1.20)      | 0.358    | 1.06 (0.95, 1.17)          | 0.300    | 1.02 (0.91, 1.15) | 0.697    | 0.085               |
| HDL Cholesterol               | 1.03 (0.92, 1.15) | 0.646    | 1.09 (0.91, 1.29)      | 0.359    | 1.19 (0.98, 1.44)          | 0.091    | 1.21 (0.99, 1.49) | 0.073    | 0.646               |
| <b><i>Severe COVID-19</i></b> |                   |          |                        |          |                            |          |                   |          |                     |
| Dyslipidemia                  | 0.83(0.67, 1.02)  | 0.071    | 0.81(0.62, 1.07)       | 0.139    | 0.83(0.60, 1.14)           | 0.267    | 0.69(0.44, 1.06)  | 0.112    | 0.132               |
| Total Cholesterol             | 0.95 (0.85, 1.06) | 0.366    | 0.98 (0.81, 1.19)      | 0.857    | 1.02 (0.84, 1.24)          | 0.856    | 1.00 (0.84, 1.20) | 0.993    | 0.366               |
| Triglycerides                 | 1.13 (0.99, 1.30) | 0.079    | 1.10 (0.91, 1.33)      | 0.344    | 1.07 (0.91, 1.27)          | 0.420    | 0.99 (0.80, 1.24) | 0.956    | 0.132               |
| LDL Cholesterol               | 0.90 (0.81, 1.00) | 0.049    | 0.95 (0.81, 1.12)      | 0.551    | 0.94 (0.81, 1.09)          | 0.408    | 0.92 (0.80, 1.07) | 0.269    | 0.132               |
| HDL Cholesterol               | 0.92 (0.81, 1.04) | 0.185    | 0.88 (0.72, 1.08)      | 0.211    | 0.90 (0.72, 1.13)          | 0.361    | 0.89 (0.71, 1.12) | 0.334    | 0.231               |

<sup>1</sup> Results described MR estimates derived from the main inverse-variance weighted, MR-Egger, weighted median and weighted mode-based methods for dyslipidemia, HDL-c, LDL-c, TC and TG to the susceptibility of COVID-19 (COVID-19) and the severity of COVID-19 (Severe COVID-19). FDR refers to the *p-value* from IVW method. Values of FDR < 0.05 are marked in italic bold. *p*, *p-value*; CI, confidence interval.

**Table 2** Summary of the observational studies for TC level in different ABO blood group<sup>1</sup>

| Subjects                          | Cohort   | Sample size | ABO blood groups     | Mean level of total cholesterol                                                                          | <i>p-value</i>                                                         | Description                                                                                                                                                            |
|-----------------------------------|----------|-------------|----------------------|----------------------------------------------------------------------------------------------------------|------------------------------------------------------------------------|------------------------------------------------------------------------------------------------------------------------------------------------------------------------|
| Healthy blood donors              | Italian  | 7,723       | A vs. O              | 183.95 ± 0.65 vs.<br>181.31 ± 0.64 (mg/dL)                                                               | 1.00 × 10 <sup>-3</sup>                                                | The values of TC and LDL-C are significantly higher in subjects with blood group A compared with those with O blood type <sup>24</sup> .                               |
| CAD patients                      | Chinese  | 6,476       | Non-O vs. O          | 4.93 ± 0.02 vs.<br>4.78 ± 0.03 (mmol/L)                                                                  | 3.80 × 10 <sup>-7</sup>                                                | Subjects of non-O type had higher levels of TC, LDL-C, and NHDL-c <sup>25</sup> .                                                                                      |
| Adolescents                       | White    | 4,460       | A <sub>1</sub> vs. O | Males: 174.20 ± 0.90 vs.<br>170.70 ± 0.80 (mg/dL)<br>Females: 181.00 ± 1.00 vs.<br>176.10 ± 0.90 (mg/dL) | Male:<br>5.00 × 10 <sup>-3</sup><br>Female:<br>3.00 × 10 <sup>-4</sup> | Blood group A with higher serum TC levels in white adolescents <sup>26</sup> .                                                                                         |
| Acute STEMI patients              | European | 1,835       | Non-O vs. O          | A:180.40 ± 34.50, B:182.10 ± 35.10, AB:180.50 ± 33.80 vs. O:175.30 ± 33.20 (mg/dL)                       | 2.30 × 10 <sup>-2</sup>                                                | The prevalence of hyperlipidemia, TC, LDL, peak CKMB and no-reflow as well as hospitalization duration were higher in patients with non-O blood groups <sup>27</sup> . |
| FH patients                       | White    | 668         | Non-O vs. O          | 9.48 ± 1.69 vs.<br>9.14 ± 1.73 (mmol/L)                                                                  | 2.00 × 10 <sup>-2</sup>                                                | Total cholesterol was significantly higher in non-O subjects compared to carriers of the O group <sup>28</sup> .                                                       |
| Coronary atherosclerosis patients | Chinese  | 371         | Non-O vs. O          | 5.05 ± 0.07 vs.<br>4.80 ± 0.10 (mmol/L)                                                                  | 4.10 × 10 <sup>-2</sup>                                                | Subjects of non-O type had higher levels of TC, LDL-C and NHDL-C compared with that of O type <sup>29</sup> .                                                          |

<sup>1</sup> Table lists the published studies which demonstrate the TC level is different in diverse ABO blood group. STEMI, ST-elevation myocardial infarction; CAD, coronary artery disease; FH, familial hypercholesterolemia.

**Table 1** The MR analysis pipeline of the current study.

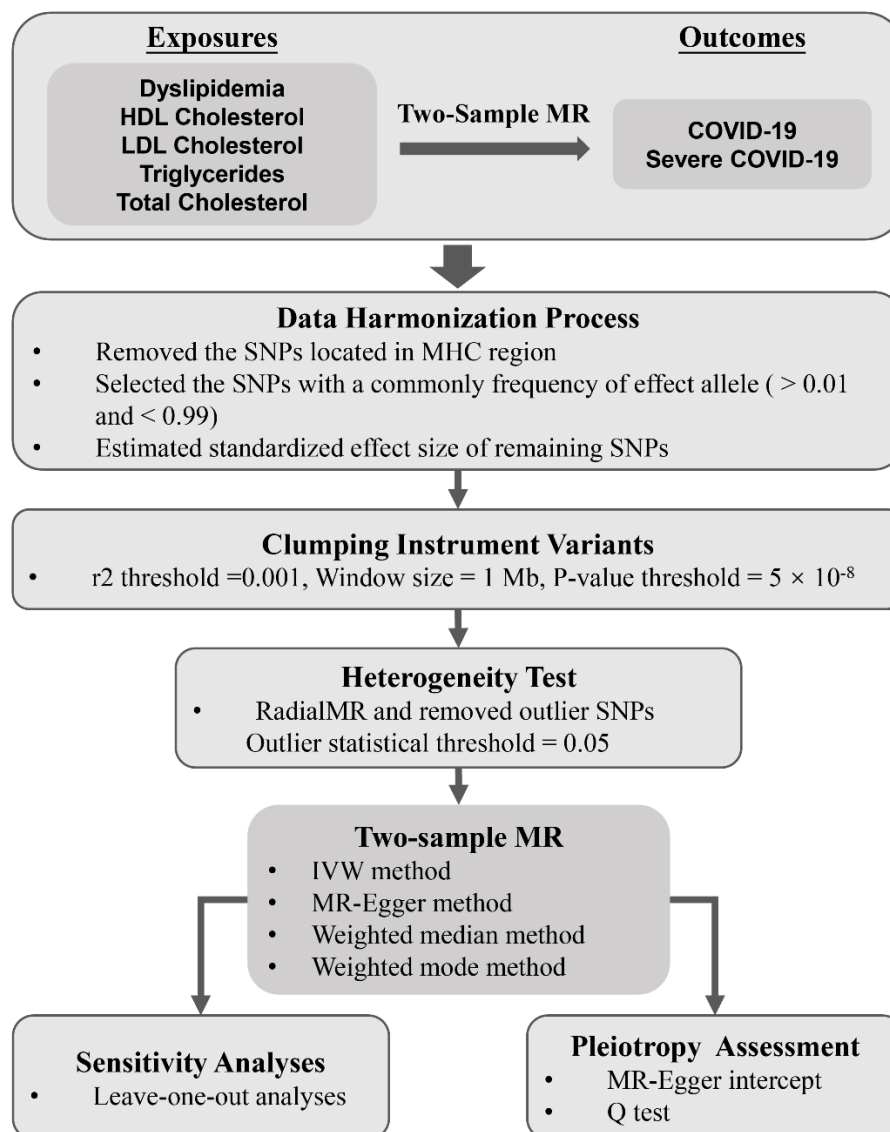

**Figure 2.** Causal effects of dyslipidemia and TC on COVID-19.

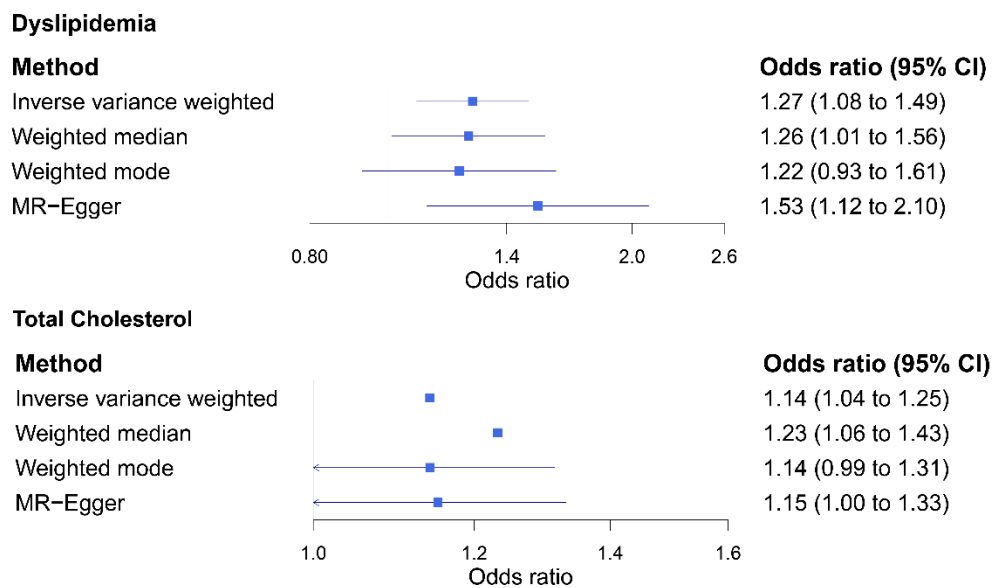

**Figure 3.** The relationships among the TC level, the susceptibility of COVID-19 and the different ABO blood group.

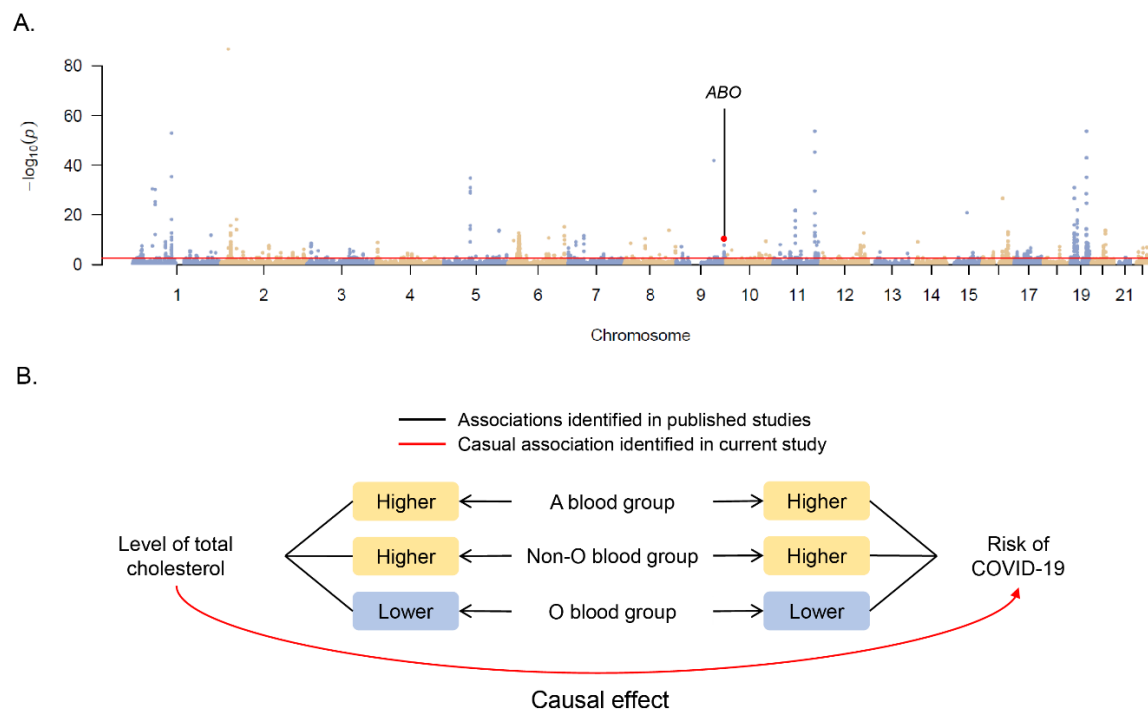



## Supporting information

**Figure S1.** Scatter plot and leave-one-out analysis plot for dyslipidemia and total cholesterol (COVID-19).

**Table S1.** Assessment of pleiotropy for dyslipidemia and blood lipids to COVID-19 and severe COVID-19.

**Table S2.** Summary of 243 genes significantly associated (FDR < 0.05) with total cholesterol.

**Table S3.** Summary of 89 biological processes significantly associated (FDR < 0.05) with total cholesterol.

**Table S4.** Summary of 20 pathways associated ( $p$ -value < 0.05) with total cholesterol.
